# Supplementary material
Source: PubMed Central journal article supplement (PMC10175223)
Supplement: NIHMS1892266-supplement-7.pdf [file NIHMS1892266-supplement-7.pdf]

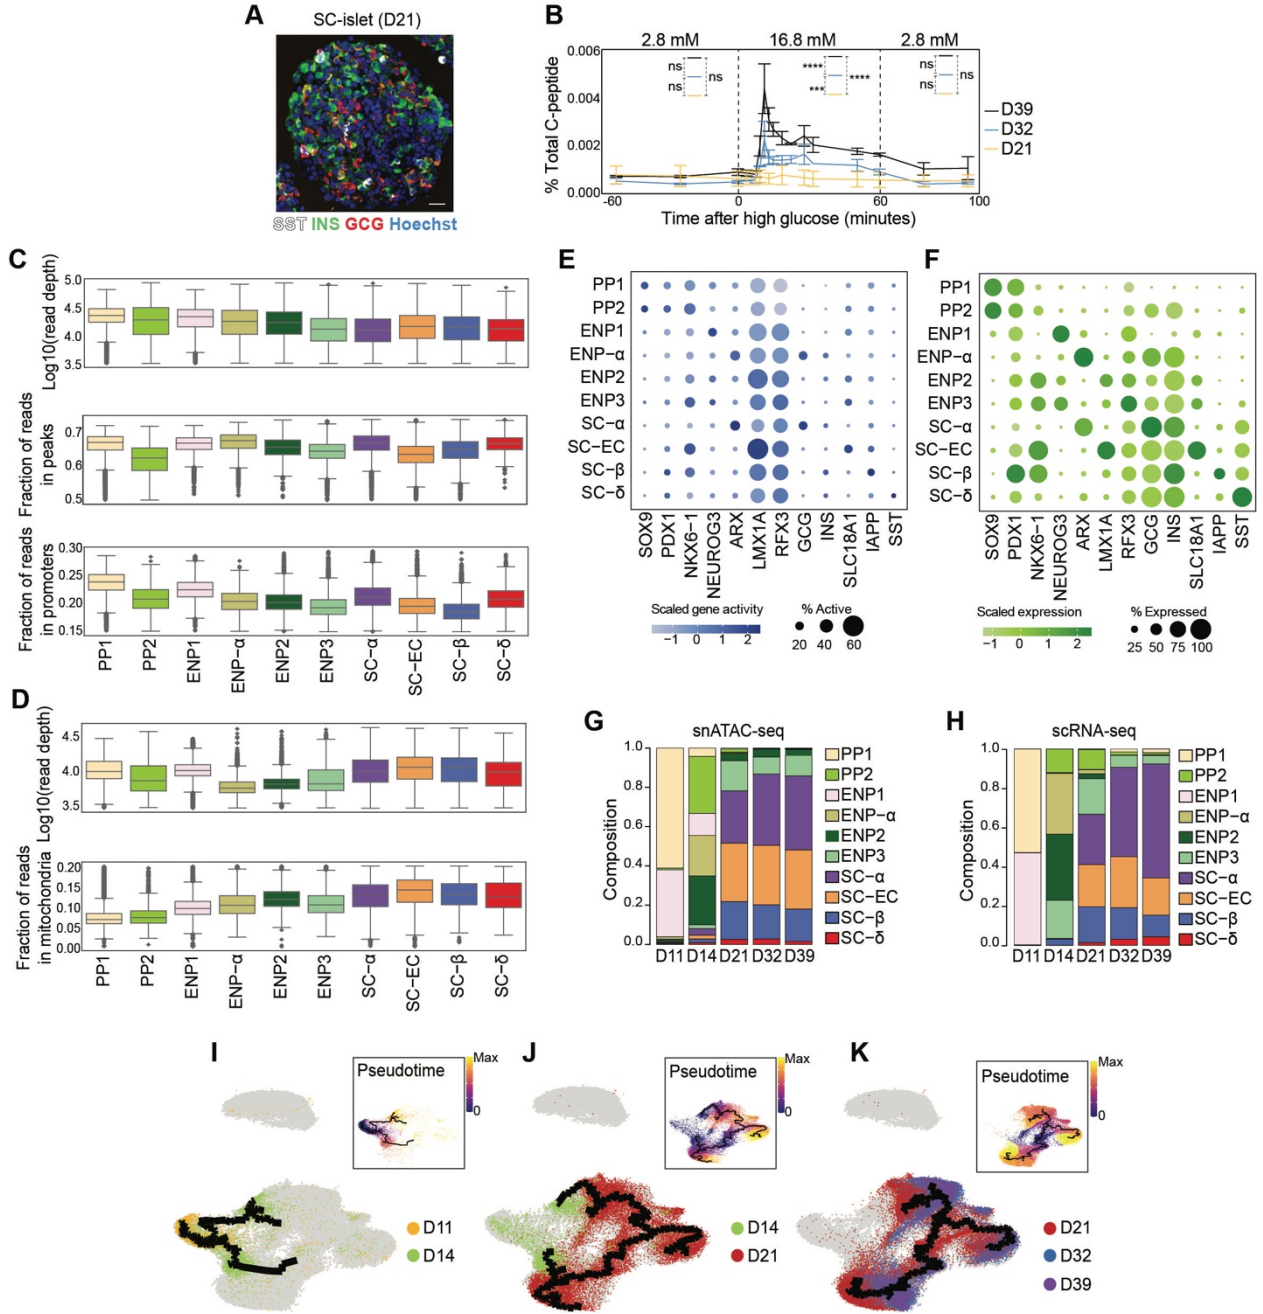

**Figure S1. Quality control of snATAC-seq and scRNA-seq data analysis - related to Figure 1.**

(A) Representative immunofluorescent images for somatostatin (SST), insulin (INS) and glucagon (GCG) at D21 of SC-islet differentiation. Nuclei were labeled with Hoechst. Scale bar, 20  $\mu$ m.

(B) Human C-peptide secretion by SC-islets at D21, D32 and D39 during perfusion with the indicated glucose (Glc) concentrations (in mM). Data are shown as mean  $\pm$  S.D. at the indicated time points. ns, not significant,  $***P < 0.001$ ,  $****P < 0.0001$ , using two-way ANOVA followed by Tukey's multiple comparisons test for different days of differentiation in each time block.

(C, D) Box plots of quality control matrices for snATAC-seq (C) and scRNA-seq (D) in each cluster in Figure 1b, showing that these metrics do not drive single-cell grouping in UMAP space.

(E, F) Dot plots showing scaled average gene activity (E) or gene expression (F). The color of each dot represents the average gene activity (E) or expression level (F) and the size of each dot the percentage of positive cells for each gene.

(G, H) Relative abundance of each cell type based on snATAC-seq (G) and scRNA-seq (H) UMAP annotations in Figure 1B. Columns represent SC-islet differentiation time points.

(I-K) Trajectory analysis based on chromatin accessibility, showing trajectories from D11 and D14 (I), D14 and D21 (J), and D21 and D32/39 (K) data with ENP1, ENP2, and ENP3 set as the root, respectively. Cells were color-coded by either time point of collection or pseudotime values (insets). PP1 and PP2 cells were excluded from the analysis.

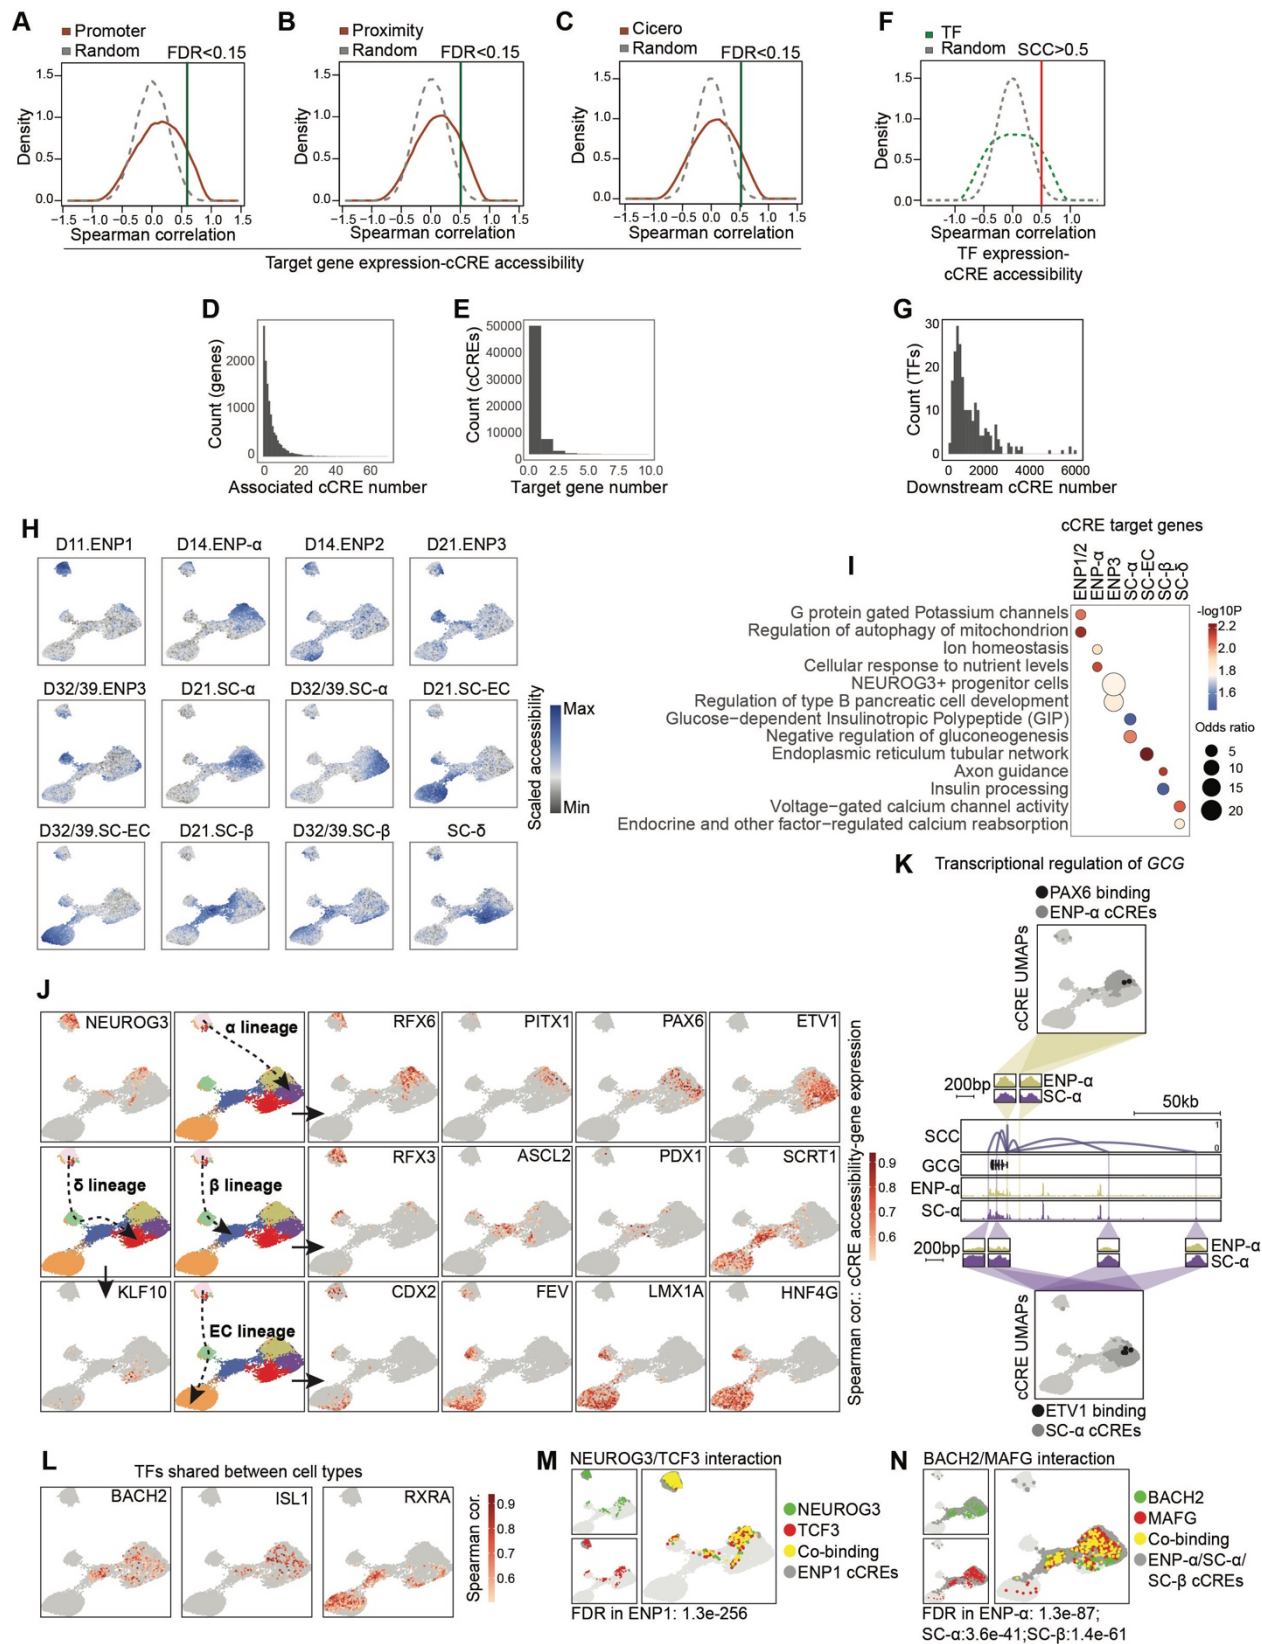

**Figure S2. Building a gene regulatory network of stem cell islet development - related to Figure 2.**

(A-C) Identification of putative cCRE-gene pairs. cCREs were assigned to a gene if they are located (A) in promoter ( $\pm 500$  bp) of target gene; (B) in proximity ( $\pm 50$  kb) of the gene promoter; or (C) show co-accessibility with the gene promoter by Cicero analysis. A total of 65,479 positively correlated cCRE-gene pairs were identified using an empirically defined significance threshold of  $FDR < 0.15$ .

(D, E) Histogram showing characteristics of cCRE-gene pairs. Each target gene in the GRN is regulated by a mean of 5.3 cCREs (D) and each cCRE regulates a mean of 1.2 target genes (E).

(F) Identification of putative TF-cCRE pairs. Putative TF-cCRE pairs were defined using motifmatchr. A total of 280,019 significantly correlated TF-cCRE pairs were identified using an empirically defined threshold of a spearman correlation coefficient (SCC)  $> 0.5$ .

(G) Histogram showing characteristics of TF-cCRE pairs. Each TF has a mean of 1,053 predicted binding sites.

(H) UMAP projections of scaled chromatin accessibility of all cCREs in each aggregated pseudo-cell. Pseudo-cells were aggregated based on time point of differentiation and assigned cell type identity.

(I) Enriched gene ontology terms/pathways among target genes associated with each cCRE module. Significance ( $-\log_{10}$  p-value) and odds ratio of the enrichments are represented by color and dot size, respectively.

(J) UMAP projections of TF-cCRE correlations for select cell type-enriched TFs. Spearman correlation coefficients between TF expression and cCRE accessibility are shown.

(K) UMAP locations and genome browser snapshots of predicted PAX6- or ETV1-bound cCREs at the *GCG* gene locus. Dark grey dots indicate cCRE modules with predicted TF interactions. Genome browser tracks show aggregated ATAC reads in ENP- $\alpha$  and SC- $\alpha$ -cells. All tracks are scaled to uniform  $1 \times 10^6$  read depth. SCC, spearman correlation coefficients for cCRE accessibility and target gene expression.

(L) UMAP projections of TF-cCRE correlations for select TFs shared between different cCRE module. Spearman correlation coefficients between TF expression and cCRE accessibility are shown.

(M, N) UMAP projections of predicted TF-TF interactions. Green dots, cCREs bound by background TF; red dots, cCREs bound by test TF; yellow dots, cCREs co-bound by both TFs; dark grey dots, cCRE module(s) with predicted TF interaction(s).



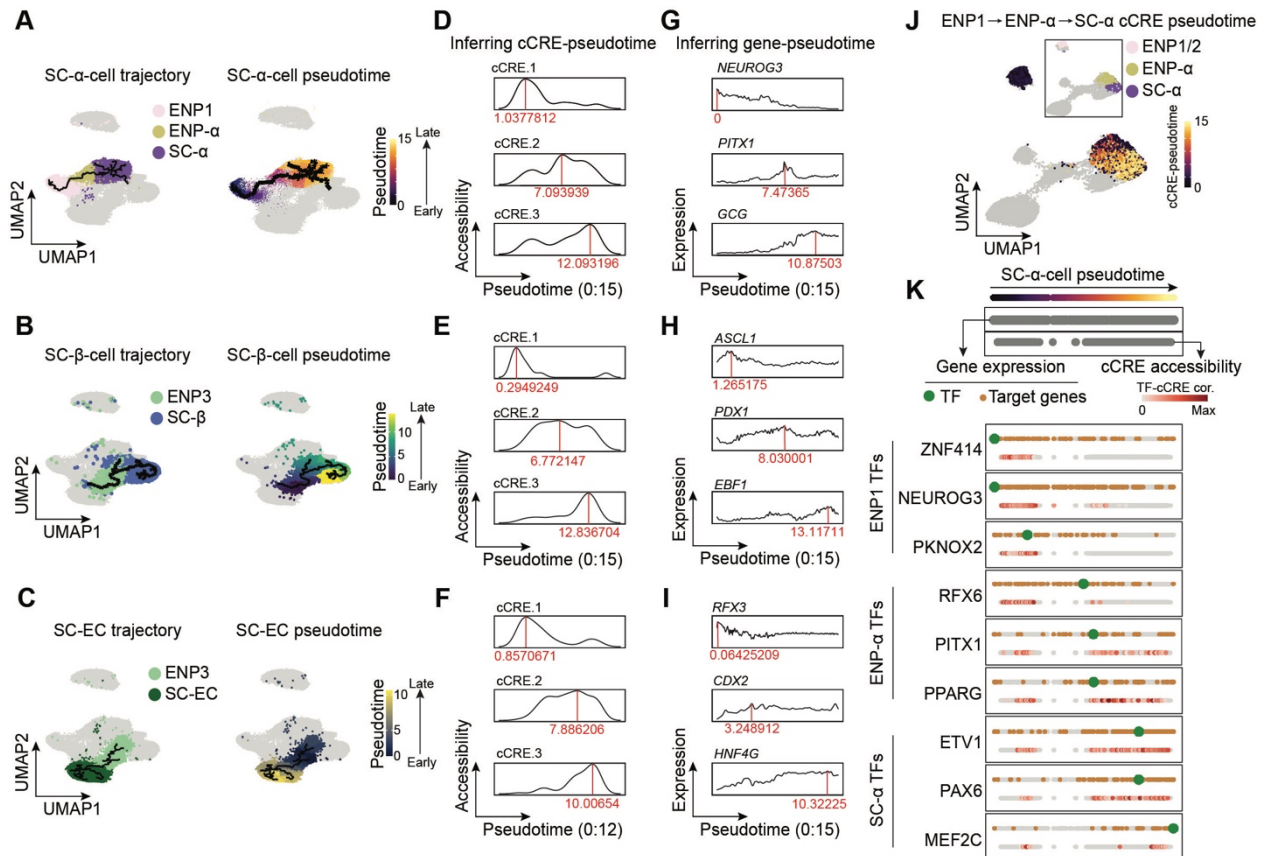

**Figure S3. Pseudotime ordering of lineage-specific transcriptional programs - related to Figure 3.**

(A-C) Feature plots showing cell cluster identity (left) and pseudotime values (right) on snATAC-seq UMAPs. (A) SC- $\alpha$ -cell trajectory (ENP1/ENP- $\alpha$ /SC- $\alpha$ -cells), (B) SC- $\beta$ -cell trajectory (ENP3/SC- $\beta$ -cells) and (C) SC-EC trajectory (ENP3/SC-ECs) are shown.

(D-F) Representative illustration of inference of cCRE accessibility in pseudotime on SC- $\alpha$ -cell (D), SC- $\beta$ -cell (E) and SC-EC (F) trajectories. Values in red represent cCRE pseudotime values based on maximal cCRE accessibility along the trajectory.

(G-I) Representative illustration of inference of gene expression in pseudotime on SC- $\alpha$ -cell (G), SC- $\beta$ -cell (H) and SC-EC (I) trajectories. Values in red represent gene pseudotime values based on maximal gene expression along the trajectory.

(J) UMAP projections of cCRE pseudotime on SC- $\alpha$ -cell lineage trajectory. Insets show cell type annotations of cCRE modules.

(K) Pseudotime ordering of transcriptional programs along SC- $\alpha$ -cell lineage trajectory from ENP1 and ENP- $\alpha$  progenitors. Gene expression and cCRE accessibility were assigned pseudotime values and plotted in two separate dotted lines (genes, top; cCREs, bottom). For each shown TF, the TF (green), TF-bound cCREs (colored based TF-cCRE correlations) and target genes (brown) are shown.

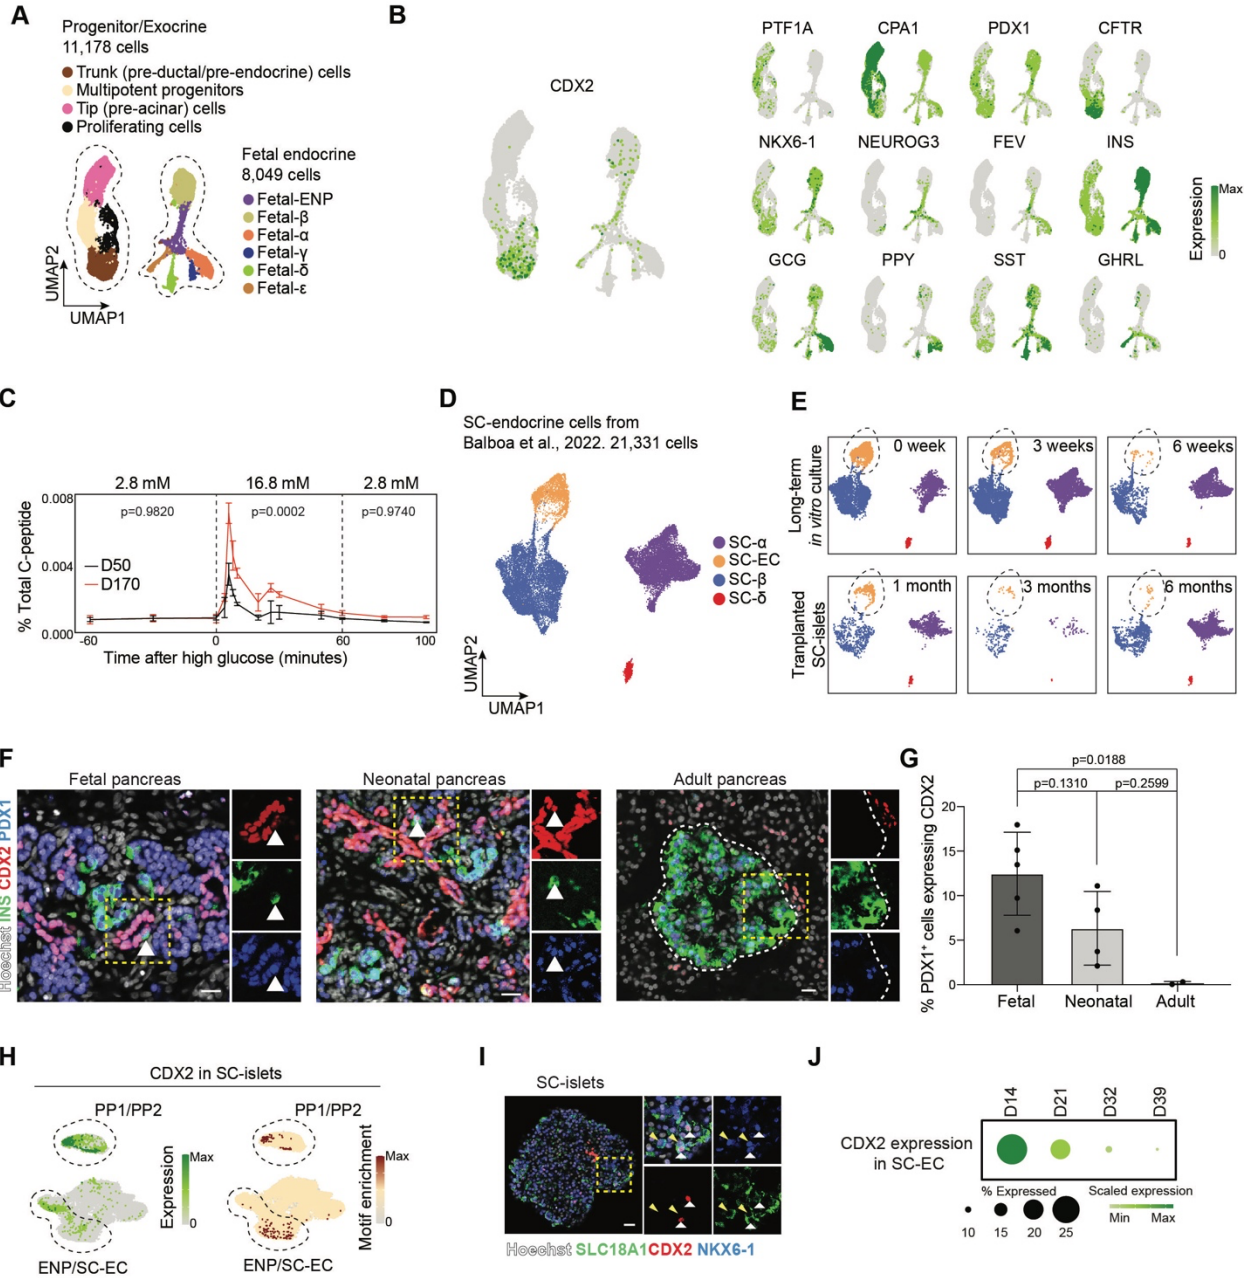

**Figure S4. Identification of CDX2-expressing cells in human fetal pancreas - related to Figure 4.**

- (A) UMAP embedding of transcriptome data from fetal human pancreas. Cluster identities were defined by expression of marker genes.
- (B) Expression of *CDX2* and cell type marker genes in fetal human pancreas.
- (C) Human C-peptide secretion by SC-islets at D50 and D170 during perfusion with the indicated glucose concentrations (in mM). Data are shown as mean  $\pm$  S.D. at the indicated time points. P-values were calculated using two-way ANOVA followed by Šidák-Holm's multiple comparisons test for different days of differentiation in each time block.
- (D) UMAP embedding of single cell transcriptome data from <sup>7</sup>. Clusters were defined based on marker gene expression.
- (E) Split UMAPs showing localization of each cell type at indicated time points after the beginning of stage 7 (top) or transplantation (bottom).
- (F) Representative immunofluorescent images for CDX2, PDX1, and insulin (INS) on human pancreas at 10 weeks post conception (wpc), postnatal day 1, and 52 years of age. Arrowheads in insets indicate CDX2 and INS co-positive cells. Nuclei were labeled with Hoechst. Scale bar, 20  $\mu$ m.
- (G) Quantification of PDX1<sup>+</sup> cells expressing CDX2 in fetal (10-20 wpc, n = 5), neonatal (1 day to 3.7 months postnatally, n = 4), and adult (20-52 years, n = 2) human pancreas. Data are shown as mean  $\pm$  S.D. P-values were calculated using Tukey's multiple comparisons test after one-way ANOVA.
- (H) *CDX2* expression (left) and *CDX2* motif enrichment (right) in cell types during SC-islet differentiation. Dash circles highlight populations with high *CDX2* expression and transcriptional activity.
- (I) Representative immunofluorescent image for CDX2, NKX6-1, and SLC18A1 on SC-islets at D21. Arrowheads in insets indicate CDX2, NKX6-1 and SLC18A1 co-positive cells. Nuclei were labeled with Hoechst. Scale bar, 20  $\mu$ m.
- (J) Dot plots showing average CDX2 expression in SC-ECs at different time points of differentiation. The color of each dot represents the expression level and the size of each dot the percentage of positive cells for each gene.

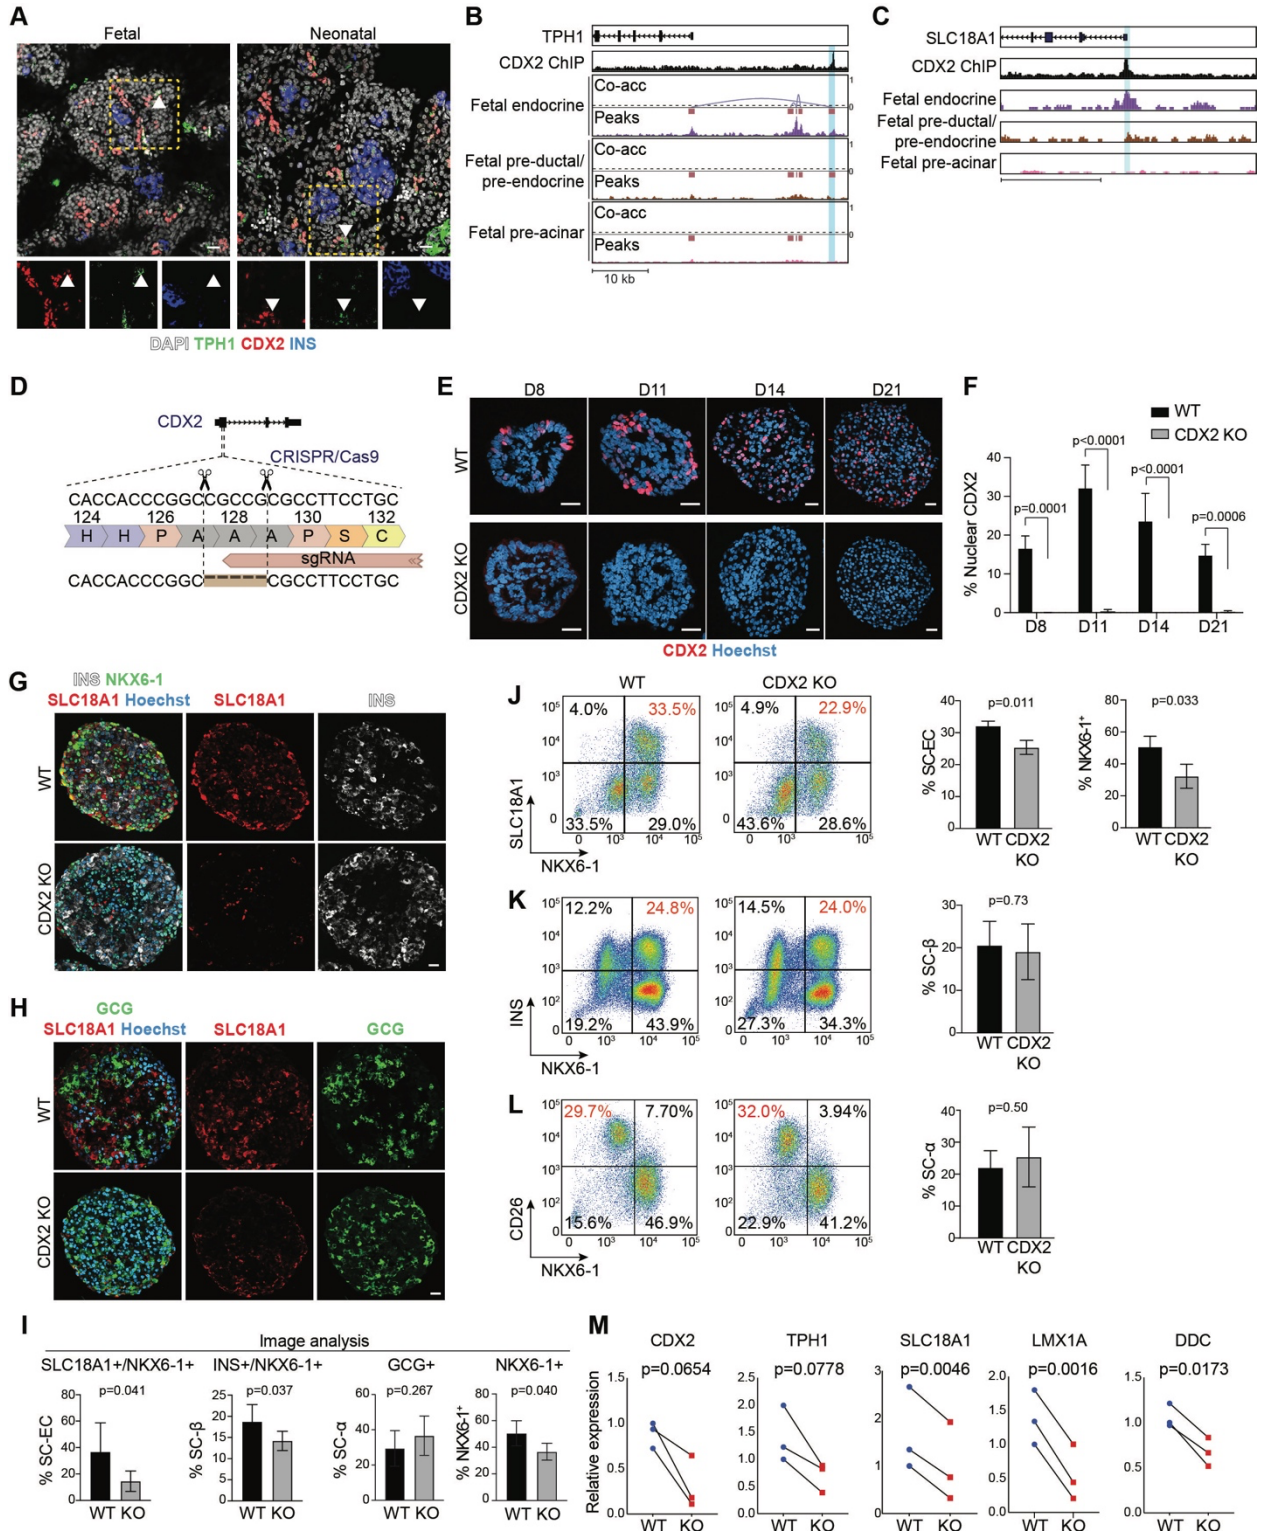



**Figure S5. *CDX2* inactivation in human pluripotent stem cells - related to Figure 5.**

(A) Representative immunofluorescent images for TPH1, *CDX2*, and insulin (INS) on human pancreas at indicated development stages. Nuclei were labeled with DAPI. Arrowheads in insets indicate *CDX2* and TPH1 co-positive cells. Scale bar, 20  $\mu\text{m}$ .

(B,C) Genome browser tracks showing *CDX2* ChIP-seq reads in SC-islets and aggregated ATAC reads in human fetal pancreatic endocrine, ductal and acinar cells at *TPH1* (B) and *SLC18A1* (C) gene loci. *CDX2*-bound cCREs are highlighted. All tracks are scaled to uniform  $1 \times 10^6$  read depth. Co-acc, co-accessibility scores between distal cCRE and transcriptional start site of *TPH1*.

(D) Schematic showing generation of *CDX2* knockout (KO) H1 hPSCs. A 5-base-pair deletion was introduced into the first exon of *CDX2*, leading to a frameshift and premature translation termination.

(E) Representative immunofluorescent images for *CDX2* from wild type (WT) and *CDX2* KO cell aggregates at different days (D) of SC-islet differentiation. Nuclei were labeled with Hoechst. Scale bar, 20  $\mu\text{m}$ .

(F) Quantification of *CDX2*<sup>+</sup> cells in WT and *CDX2* KO cell aggregates at different days of SC-islet differentiation. Data are shown as mean  $\pm$  S.D. P-values were calculated using two-way ANOVA followed by Šidák-Holm's multiple comparisons test for different days of differentiation.

(G) Representative immunofluorescent images for insulin (INS), NKX6-1 and *SLC18A1* on WT and *CDX2* KO SC-islets at D21. Nuclei were labeled with Hoechst. Scale bar, 20  $\mu\text{m}$ .

(H) Representative immunofluorescent images for glucagon (GCG) and *SLC18A1* on WT and *CDX2* KO SC-islets at D21. Nuclei were labeled with Hoechst. Scale bar, 20  $\mu\text{m}$ .

(I) Quantification of the percentage of SC-ECs (*SLC18A1*<sup>+</sup>/*NKX6-1*<sup>+</sup>), SC- $\beta$ -cells (*INS*<sup>+</sup>/*NKX6-1*<sup>+</sup>), SC- $\alpha$ -cells (*GCG*<sup>+</sup>) and total *NKX6-1*<sup>+</sup> cells in SC-islets based on immunofluorescent staining in (G) and (H). Data are shown as mean  $\pm$  S.D. ( $n = 3$  independent differentiations). P-values were calculated by unpaired two-tailed t-test.

(J-L) Representative flow cytometry plots (left, percentage of population of interest in red) and quantifications (right) of SC-ECs (*NKX6-1*<sup>+</sup>/*SLC18A1*<sup>+</sup>), total *NKX6-1*<sup>+</sup> cells (J), SC- $\beta$ -cells (*NKX6-1*<sup>+</sup>/*INS*<sup>+</sup>, K), and SC- $\alpha$ -cells (*NKX6-1*<sup>+</sup>/*CD26*<sup>+</sup>, L) in WT and *CDX2* KO SC-islets at D21. Data are shown as mean  $\pm$  S.D. ( $n = 3$  independent differentiations). P-values were calculated by unpaired two-tailed t-test.

(M) qPCR analysis of *CDX2* and serotonin synthesis genes in WT and *CDX2* KO SC-islets at D21.  $n = 100$  SC-islets per group from 3 independent differentiations. P-values were calculated by two-tailed paired t-test.

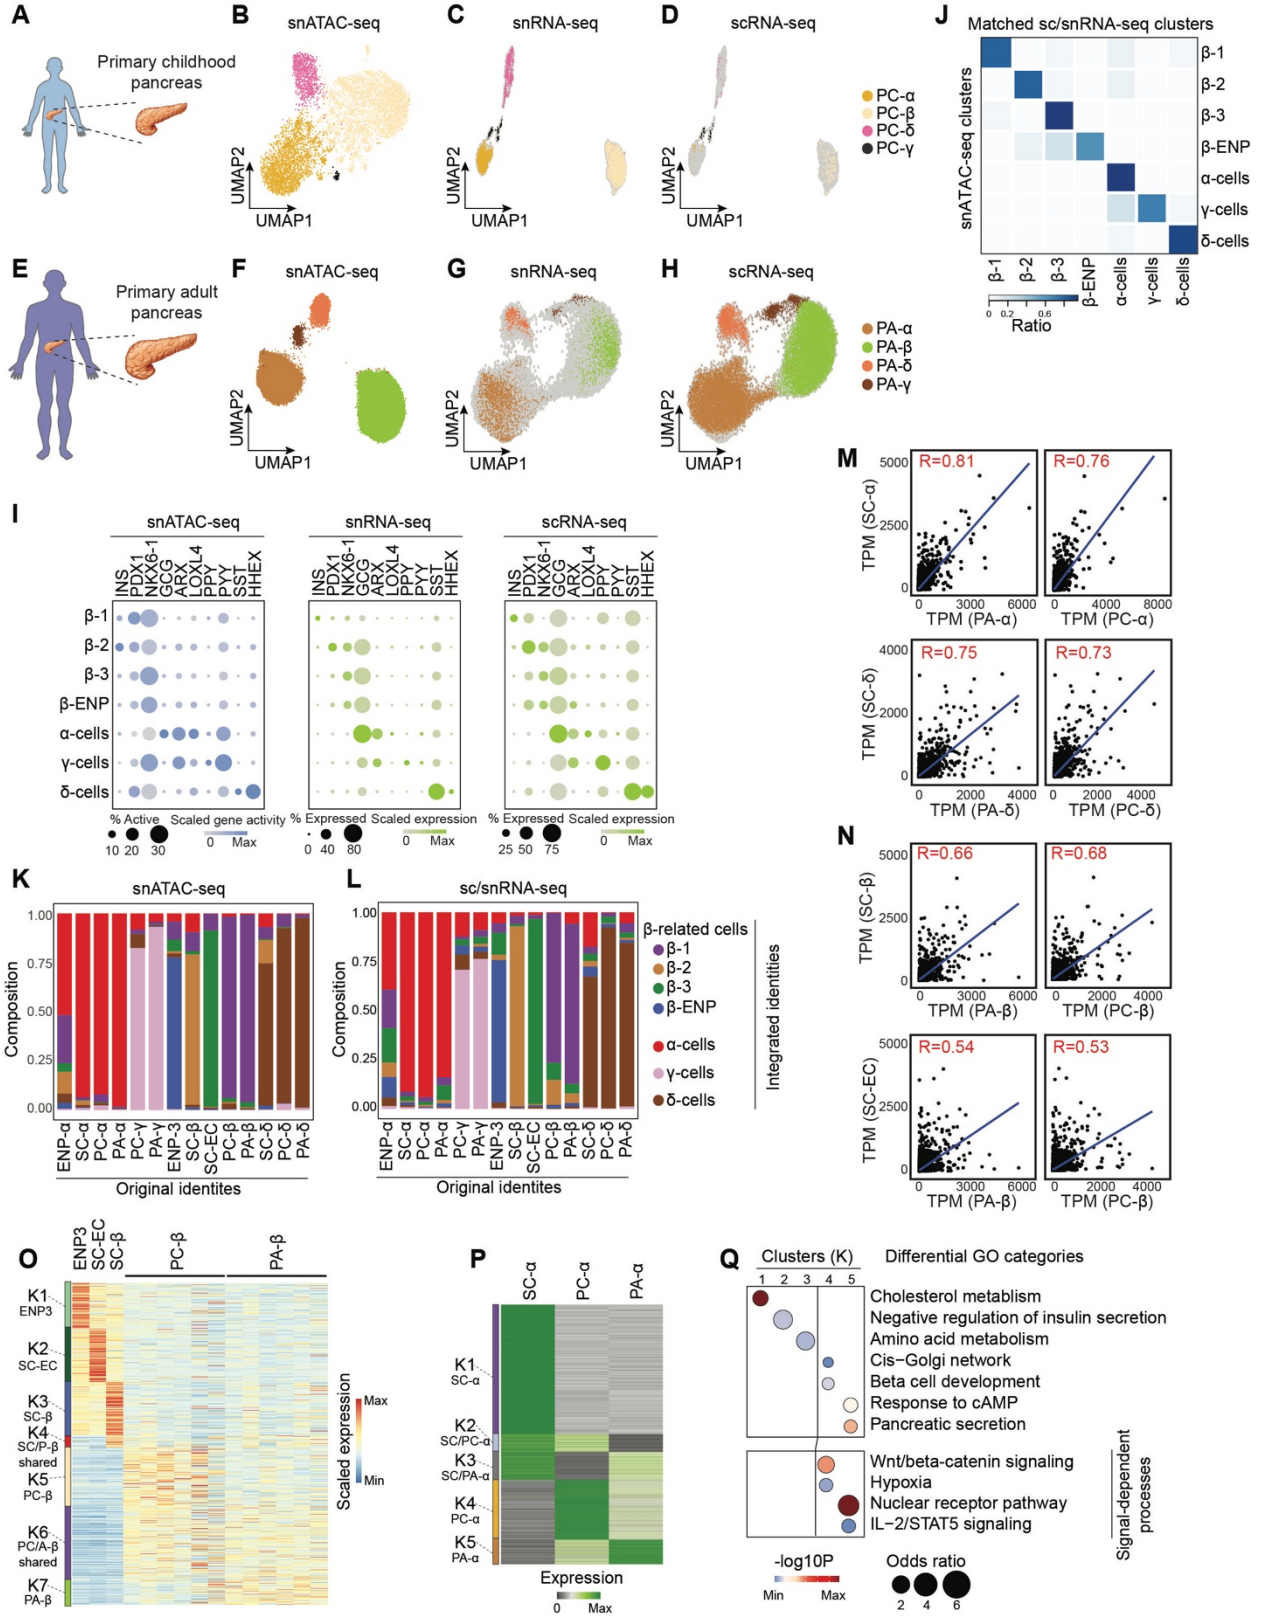



**Figure S6. Integration of chromatin accessibility and transcriptome data from stem cell islets and primary pancreas - related to Figure 6.**

(A) Schematic showing source of cells used in single cell analyses of primary childhood human pancreas.

(B-D) UMAP embedding of chromatin accessibility (B) and transcriptome (C and D) data from isolated nuclei (C) or whole cells (D) from childhood pancreas. Cluster identities were defined by promoter accessibility (snATAC-seq) or expression (sc/snRNA-seq) of marker genes.

(E) Schematic showing source of cells used in single cell analyses of primary adult human pancreas.

(F-H) UMAP embedding of chromatin accessibility (F) and transcriptome (G and H) data from isolated nuclei (G) or whole cells (H) from adult pancreas. Cluster identities were defined by promoter accessibility (snATAC-seq) or expression (sc/snRNA-seq) of marker genes.

(I) Dot plots showing scaled average gene activity (left) or gene expression (middle and right). The color of each dot represents the average gene activity or expression level and the size of each dot the percentage of positive cells for each gene.

(J) Heatmap showing ratio of cells with identities in sc/snRNA-seq (column) data matching identities in snATAC-seq (row) data.

(K, L) Comparison of integrated cell type annotations based on snATAC-seq (K) and scRNA-seq (L) UMAP in Figure 6B,C to cell type annotations before data integration.

(M,N) Scatter plots showing normalized gene expression (TPM) in indicated cell types. Dots denote individual genes. R scores indicate Spearman correlation between two cell types.

(O) K-means clustering of genes with variable expression across  $\beta$ -related cell types (ENP3, SC-ECs, SC- $\beta$ -cells, PC- $\beta$ -cells, and PA- $\beta$ -cells). Clusters were annotated and color-coded based on gene expression patterns. PC- and PA- $\beta$ -cells from individual donor were plotted.

(P) K-means clustering of genes with variable expression across  $\alpha$ -related cell types (SC- $\alpha$ -cells, PC- $\alpha$ -cells, and PA- $\alpha$ -cells). Clusters were annotated and color-coded based on gene expression patterns.

(Q) Enriched gene ontology terms/pathways in each cluster. Significance ( $-\log_{10}$  p-value) and odds ratio of the enrichments are represented by color and dot size, respectively.

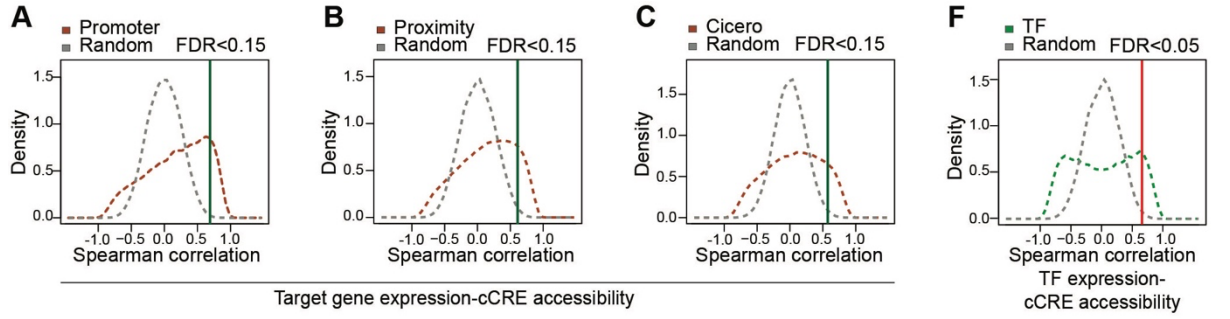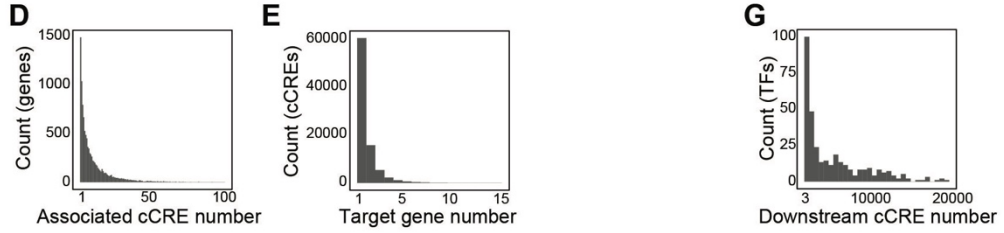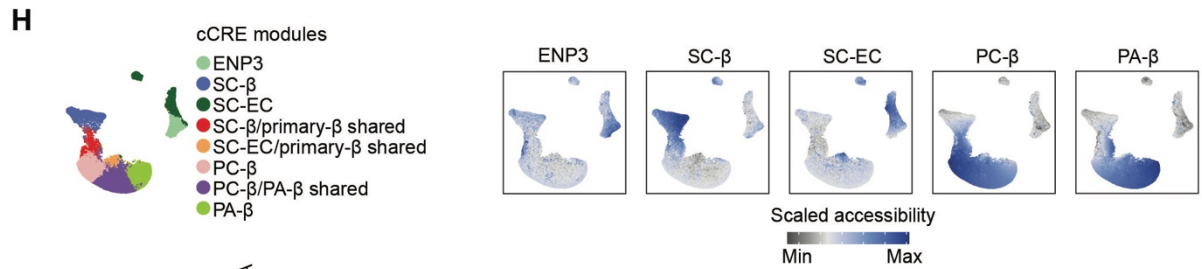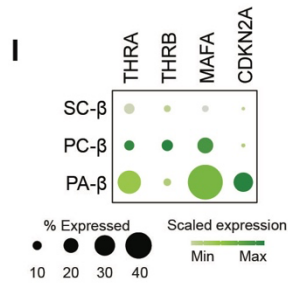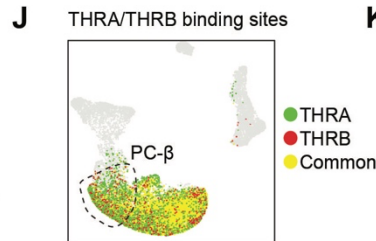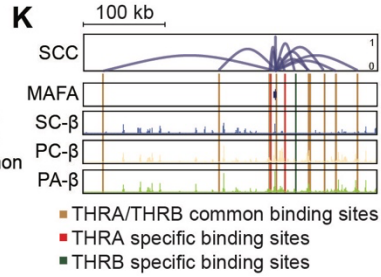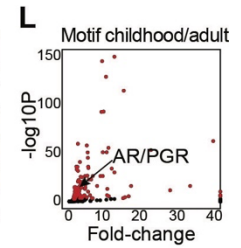

**Figure S7. Building a gene regulatory network of  $\beta$ -cell maturation - related to Figure 7.**

(A-C) Identification of putative cCRE-gene pairs. cCREs were assigned to a gene if they are located (A) in promoter ( $\pm 500$  bp) of target gene; (B) in proximity ( $\pm 50$  kb) of the gene promoter; or (C) show co-accessibility with the gene promoter by Cicero analysis. A total of 167,618 positively correlated cCRE-gene pairs were identified using an empirically defined significance threshold of  $FDR < 0.15$ .

(D, E) Histogram showing characteristics of cCRE-gene pairs. Each target gene in the GRN is regulated by a mean of 13.6 cCREs (D) and each cCRE regulates a mean of 1.55 target genes (E).

(F) Identification of putative TF-cCRE pairs. Putative TF-cCRE pairs were defined using motifmatchr. A total of 1,017,318 significantly correlated TF-cCRE pairs were identified using an empirically defined threshold of  $FDR < 0.05$ .

(G) Histogram showing characteristics of TF-cCRE pairs. Each TF has a mean of 2,698 predicted binding sites.

(H) UMAP projections of scaled chromatin accessibility of all cCREs in each aggregated pseudo-cell. Pseudo-cells were aggregated based on cell type identities of primary cells and stem cell-derived populations before data integration.

(I) Dot plots showing average *THRA*, *THRB*, *MAFA* and *CDKN2A* expression SC-, primary childhood (PC)- and primary adult (PA)- $\beta$ -cells. The color of each dot represents the expression level and the size of each dot the percentage of positive cells for each gene.

(J) UMAP projections of predicted *THRA* and *THRB* binding sites. Green dots, cCREs bound by *THRA*; red dots, cCREs bound by *THRB*; yellow dots, cCREs co-bound by both TFs.

(K) Genome browser tracks show aggregated ATAC reads in SC-, PC- and PA- $\beta$ -cells. All tracks are scaled to uniform  $1 \times 10^6$  read depth. SCC, spearman correlation coefficients for cCRE accessibility and target gene expression.

(L) Scatter plot showing fold-change and significance ( $-\log_{10}$  p-value) of TF motif enrichment at chromatin sites with increased H3K27ac signals in childhood ( $< 9$  years)  $\beta$ -cells against a background of sites with increased H3K27ac signal in adult  $\beta$ -cells. Dots denote individual TF motifs.

| <b>Oligonucleotide names</b>                 | <b>Sequence (5' to 3')</b> |
|----------------------------------------------|----------------------------|
| <i>sgRNA oligos</i>                          |                            |
| sgRNA targeting human CDX2                   | GAGAAGCGCAGGAAGGCGCGG      |
| <i>PCR genotyping primers for CDX2 locus</i> |                            |
| gt-CDX2-forward                              | TCACGGCCTCAACGGTGGCT       |
| gt-CDX2-reverse                              | GCCTTCCCAAGCACCTCCGAA      |
| <i>qPCR primers</i>                          |                            |
| LMX1A-f                                      | AGTGTCTACAGCTCAGATCCC      |
| LMX1A-r                                      | GGTCATGGAAAAGGGGCTCG       |
| DDC-f                                        | TGGGGACCACAACATGCTG        |
| DDC-r                                        | TCAGGGCAGATGAATGCACTG      |
| CDX2-f                                       | GACGTGAGCATGTACCCTAGC      |
| CDX2-r                                       | GCGTAGCCATTCCAGTCCT        |
| TPH1-f                                       | ACGTCGAAAGTATTTTGCGGA      |
| TPH1-r                                       | ACGGTTCCCCAGGTCTTAATC      |
| SLC18A1-f                                    | AAGGCTGTGATGCAACTTCTG      |
| SLC18A1-r                                    | CGGGCCACAAAGAGTAGAGTAT     |

**Table S7. Oligonucleotides used in this study, related to STAR Methods Key Resource Table (Oligonucleotides section)**
